# Supplementary material for: Combining dietary phenolic antioxidants with polyvinylpyrrolidone: transparent biopolymer films based onp-coumaric acid for controlled release
Source: Royal Society of Chemistry journal article supplement (doi:10.1039/c8tb03017k), 2019-01-01
Supplement: c8tb03017k1.pdf [file c8tb03017k1.pdf]

## Supplementary Information

### Combining Dietary Phenolic Antioxidants with Polyvinylpyrrolidone: Transparent Biopolymer Films based on *p*-Coumaric Acid for Controlled Release

*Marco Contardi<sup>a,b\*</sup>, José A. Heredia-Guerrero<sup>a\*</sup>, Susana Guzman-Puyol<sup>a</sup>, Maria Summa<sup>c</sup>, José J. Benítez<sup>d</sup>, Luca Goldoni<sup>e</sup>, Gianvito Caputo<sup>a,#</sup>, Giovanni Cusimano<sup>f</sup>, Pasquale Picone<sup>f</sup>, Marta Di Carlo<sup>f</sup>, Rosalia Bertorelli<sup>c</sup>, Athanassia Athanassiou<sup>a</sup>, Ilker S. Bayer<sup>a\*</sup>.*

<sup>a</sup> Smart Materials, Istituto Italiano di Tecnologia, Via Morego, 30, Genova 16163, Italy

<sup>b</sup> DIBRIS, University of Genoa, via Opera Pia 13, 16145, Genoa, Italy

<sup>c</sup> *In Vivo* Pharmacology Facility, Istituto Italiano di Tecnologia, Via Morego, 30, Genova 16163, Italy

<sup>d</sup> Instituto de Ciencia de Materiales de Sevilla, Centro mixto CSIC-Universidad de Sevilla, Americo Vespucio 49, Isla de la Cartuja, Sevilla 41092, Spain

<sup>e</sup> Analytical Chemistry Facility, Istituto Italiano di Tecnologia, Via Morego, 30, Genova 16163, Italy

<sup>f</sup> Istituto di Biomedicina ed Immunologia Molecolare "A. Monroy", CNR, via Ugo La Malfa 153, Palermo 90147, Italy

\* Corresponding authors

Email address: [marco.contardi@iit.it](mailto:marco.contardi@iit.it) (Marco Contardi); [jose.heredia-guerrero@iit.it](mailto:jose.heredia-guerrero@iit.it) (José A. Heredia-Guerrero); [ilker.bayer@iit.it](mailto:ilker.bayer@iit.it) (Ilker S. Bayer).

<sup>#</sup>Current addres: Nanochemistry, Istituto Italiano di Tecnologia, Via Morego, 30, Genova 16163, Italy.

## Transparency analysis

To determine the transparency of the films, UV-VIS spectra were recorded in the range from 400 to 800 nm. As representative examples, the UV-VIS spectra of PVP/PCA 1:0, 2:1, 5:1, and 10:1 are shown in Figure S1A. Minimum values of absorbance were observed for PVP/PCA 1:0 in the analyzed range, while the samples containing PCA exhibited higher values. From these spectra, transparency was calculated according to the ASTM 1746 by normalizing the values for 50  $\mu\text{m}$  thickness<sup>1</sup>, Figure S1B. In general, transparency values were high, typical of transparent materials, and ranged from ~72% for PVP/PCA 2:1 to ~82% for PVP/PCA 10:1 and 7.5:1.

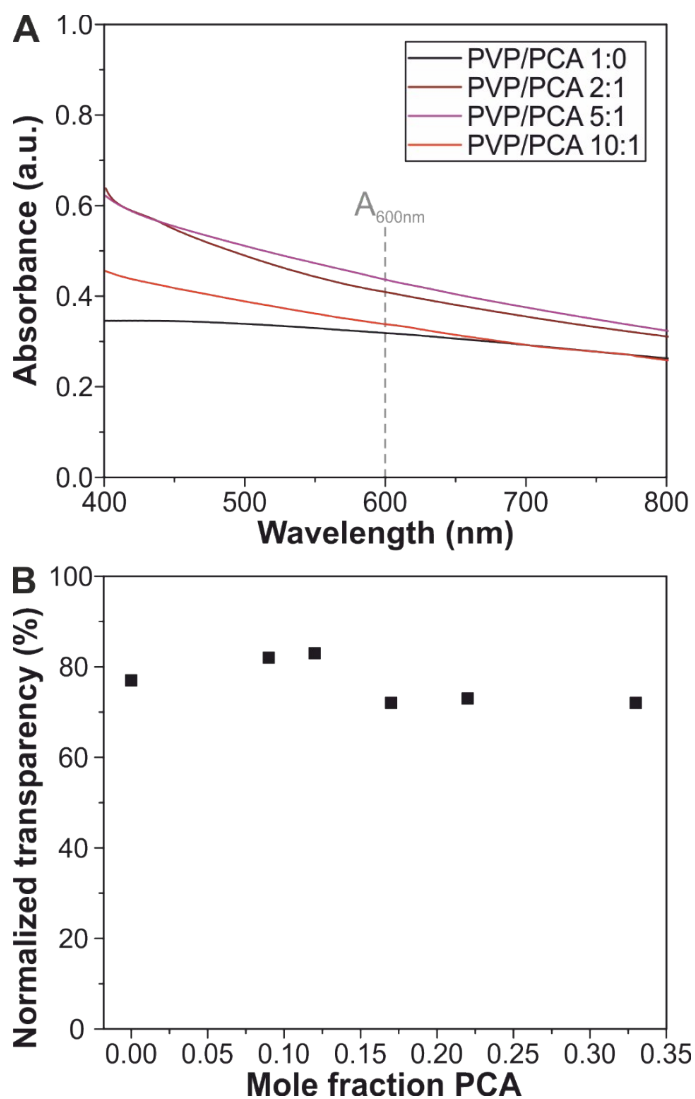

**Figure S1.** **A**, UV-VIS- spectra in the range 400-800 nm for PVP/PCA 1:0, 2:1, 5:1 and 10:1 samples. **B**, normalized transmittance as a function of the mole fraction of PCA.

### Morphological Analysis

The cross-section of the PVP/PCA 10:1 and 2:1 samples were obtained by cutting cross-section slices with Leica UCS ultramicrotome equipped with a glass knife. After, the samples were coated with a thin layer of gold and SEM imaging was performed using SEM JEOL-JSM 6490 operating with an acceleration voltage of 10 kV. The obtained images are reported in Figure 2 A-B.

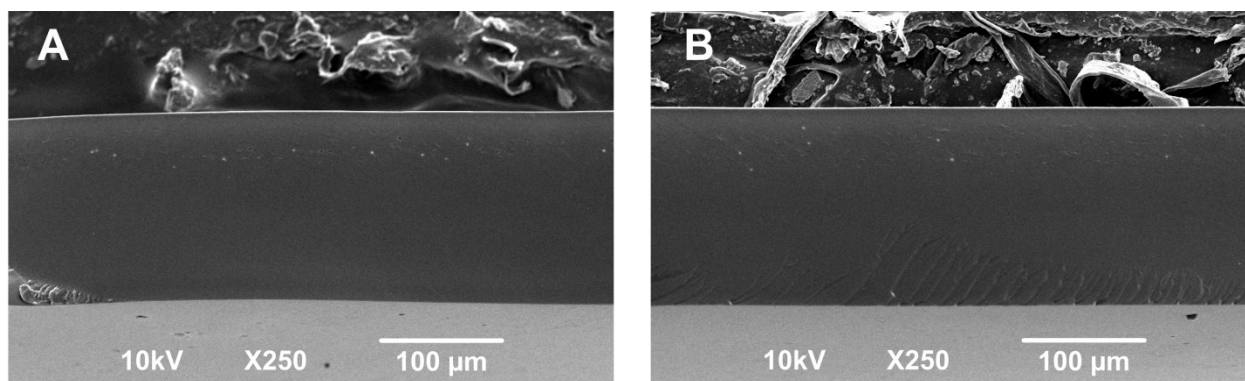

**Figure S2.** **A**, **B**, Cross-section SEM images of the PVP/PCA 10:1 and 2:1 samples, respectively.

## Nuclear Magnetic Resonance (NMR) analysis

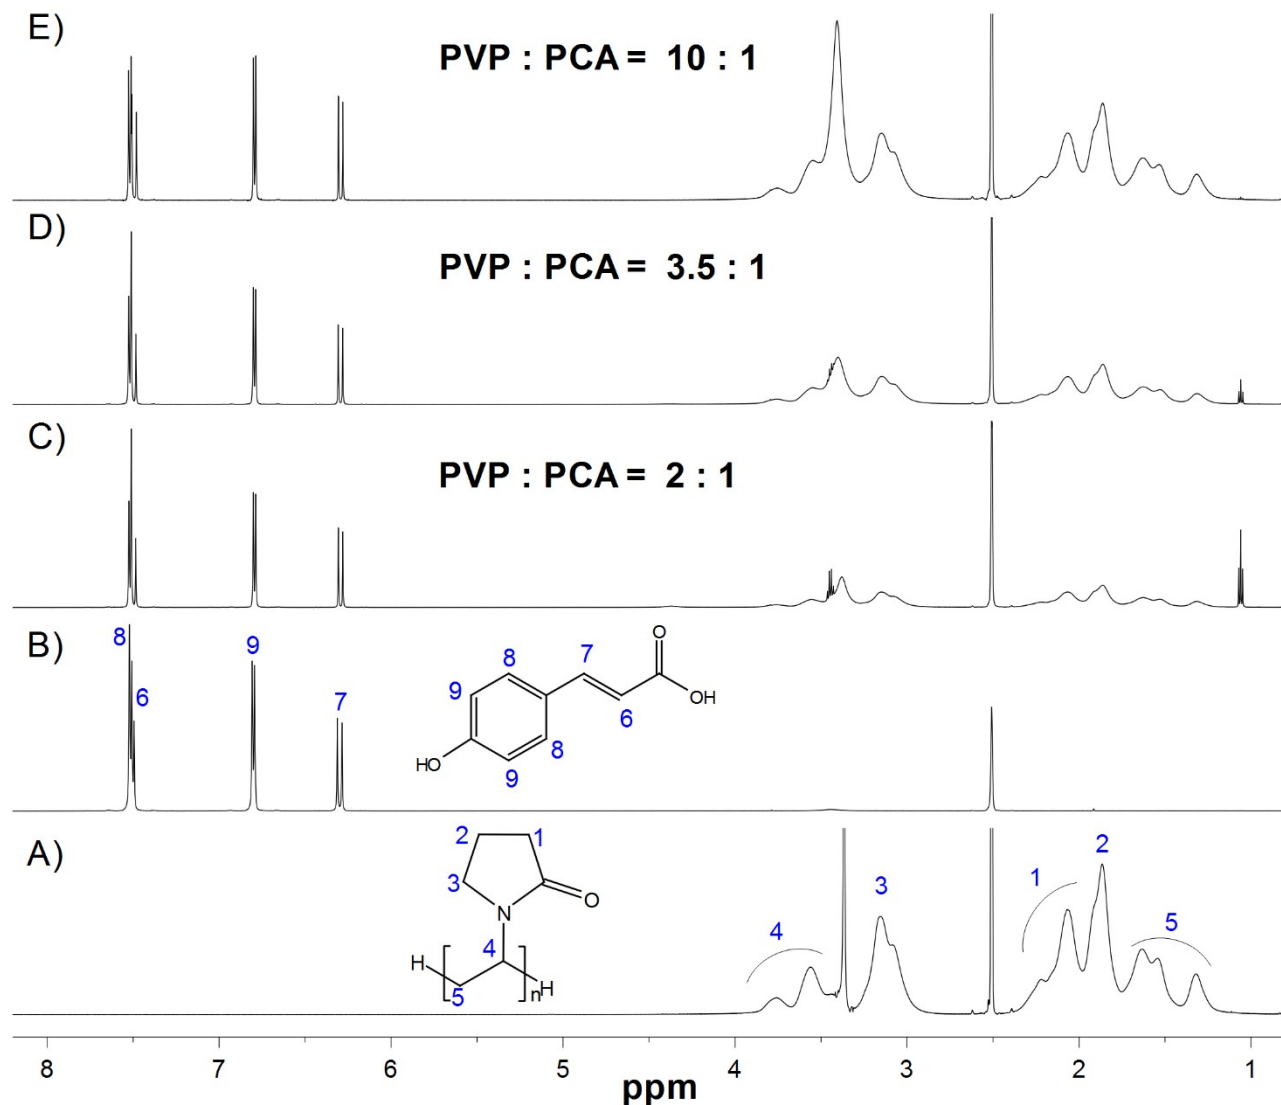

**Figure S3.**  $^1\text{H}$  NMR in DMSO- $d_6$  of A) PVP, B) PCA, C) PVP/PCA 2:1, D) PVP/PCA 3.5:1, E) PVP/PCA 10:1.

The  $^1\text{H}$  NMR spectrum of PVP shows signals between 1 and 4 ppm whose assignments are reported in **Figure S3A**. Such signals are broad and with unresolved fine structure, characteristic of polymers (with short  $T_2$ , the transversal correlation time). On the contrary, signals between 6.26 and 7.53 ppm are sharp and with a recognizable multiplicity, typical of small molecules (with long  $T_2$  time)<sup>2</sup>. Assignments, in such a region, reported in **Figure S3B**, are attributed to the *p*-coumaric acid moiety (region of double bonds and aromatic  $^1\text{H}$ ). Such signals remain

substantially unaffected by applying a 1D-CPMG<sup>3</sup> acquisition scheme **Figure S4** while the broad signals belonging to the PVP moiety are reduced in intensity down to the baseline. We can thus exclude that the *p*-coumaric acid is chemically bound to the PVP.

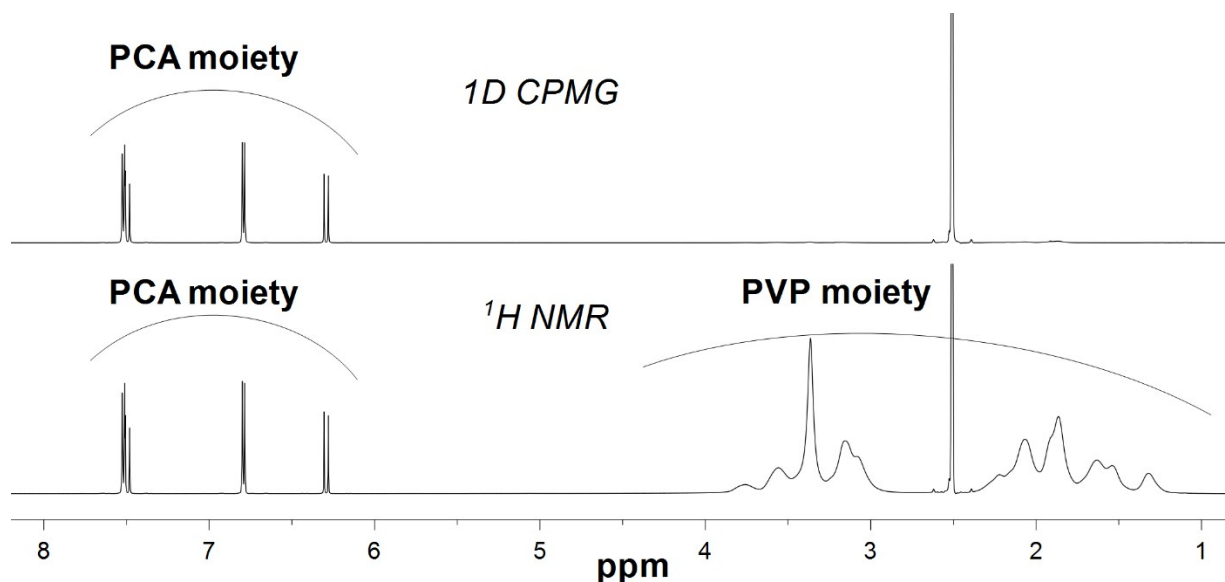

**Figure S4.** <sup>1</sup>H NMR and 1D-CPMG of the PVP/PCA 10:1 sample in DMSO-d<sub>6</sub>. The PVP signals are suppressed after the application of a 1D CPMG acquisition scheme, while the signals of PCA are only slightly decrease in intensity (due to their intrinsic T<sub>2</sub> resonance decay). Analogous results were obtained with all the samples.

### Kinetics data

From the drug release data showed in Figures 6A,B the apparent rate constants were calculated, Figure S5. The increase of cumulative percentages was empirically best fitted to a  $\ln(1-P) = -kt$  first-order kinetic law, where  $P$  is the fraction of PCA released at time  $t$  and  $k$  is the apparent rate constant. As an example, the fittings of PVP/PCA 10:1 and 2:1 are displayed in Figure S5A. Rate constants were reduced with the PCA content, ranging from  $\sim 1.10 \text{ h}^{-1}$  for PVP/PCA 10:1 to

to  $\sim 0.04 \text{ h}^{-1}$  for PVP/PCA 2:1, Figure S5B. An important drop in the value of  $k$  was observed between PVP/PCA 7.5:1 and 3.5:1. This phenomenon can be related to a PCA content-dependent formation of H-bonds, as described in the infrared characterization.

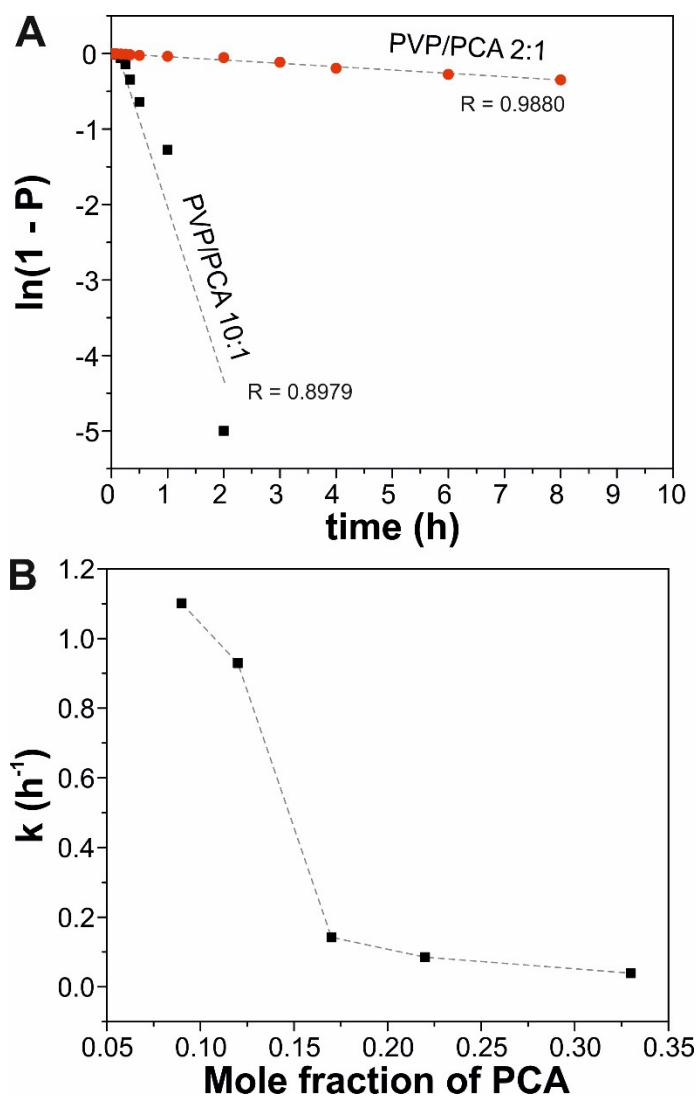

**Figure S5.** **A**, first-order fitting of drug release experiments for PVP/PCA 10:1 and 2:1. The correlation factor  $R$  is included. **B**, calculated kinetic constants as a function of the mole fraction of PCA.

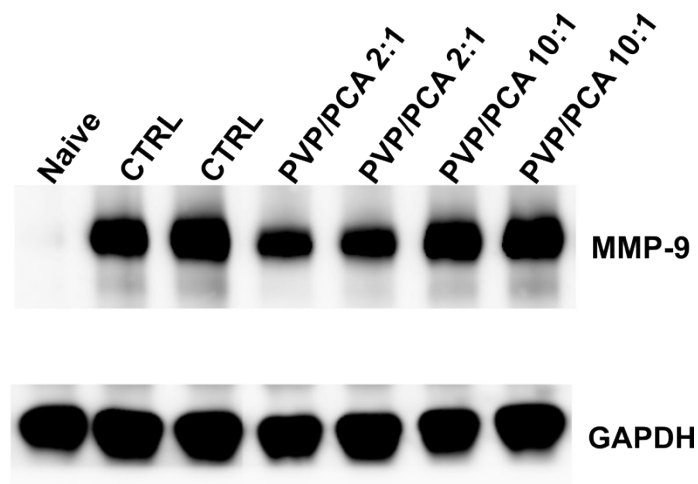

**Figure S6.** Western blot analysis of MMP-9 protein in naïve, sham, PVP/PCA 2:1 and PVP/PCA 10:1 mice. The blot is representative of 3 different analyses and illustrates the MMP-9 protein expression in mouse wounded skin. GAPDH was used as internal control. Protein weights are expressed in kDa.

## References

- (1) ASTM D1746-15, Standard Test Method for Transparency of Plastic Sheeting. ASTM International: West Conshohocken.
- (2) Bloembergen, N.; Purcell, E. M.; Pound, R. V. Relaxation effects in nuclear magnetic resonance absorption. *Physical review* **1948**, *73*, 679.
- (3) Carr, H. Y.; Purcell, E. M. Effects of diffusion on free precession in nuclear magnetic resonance experiments. *Physical review* **1954**, *94*, 630.
